# Supplementary material
Source: publisher site journal article supplement (https://jhr.pensoft.net/article/59365/download/suppl/35/)
Supplement: Supplementary file 1

Suppl. material 5. Figure S3

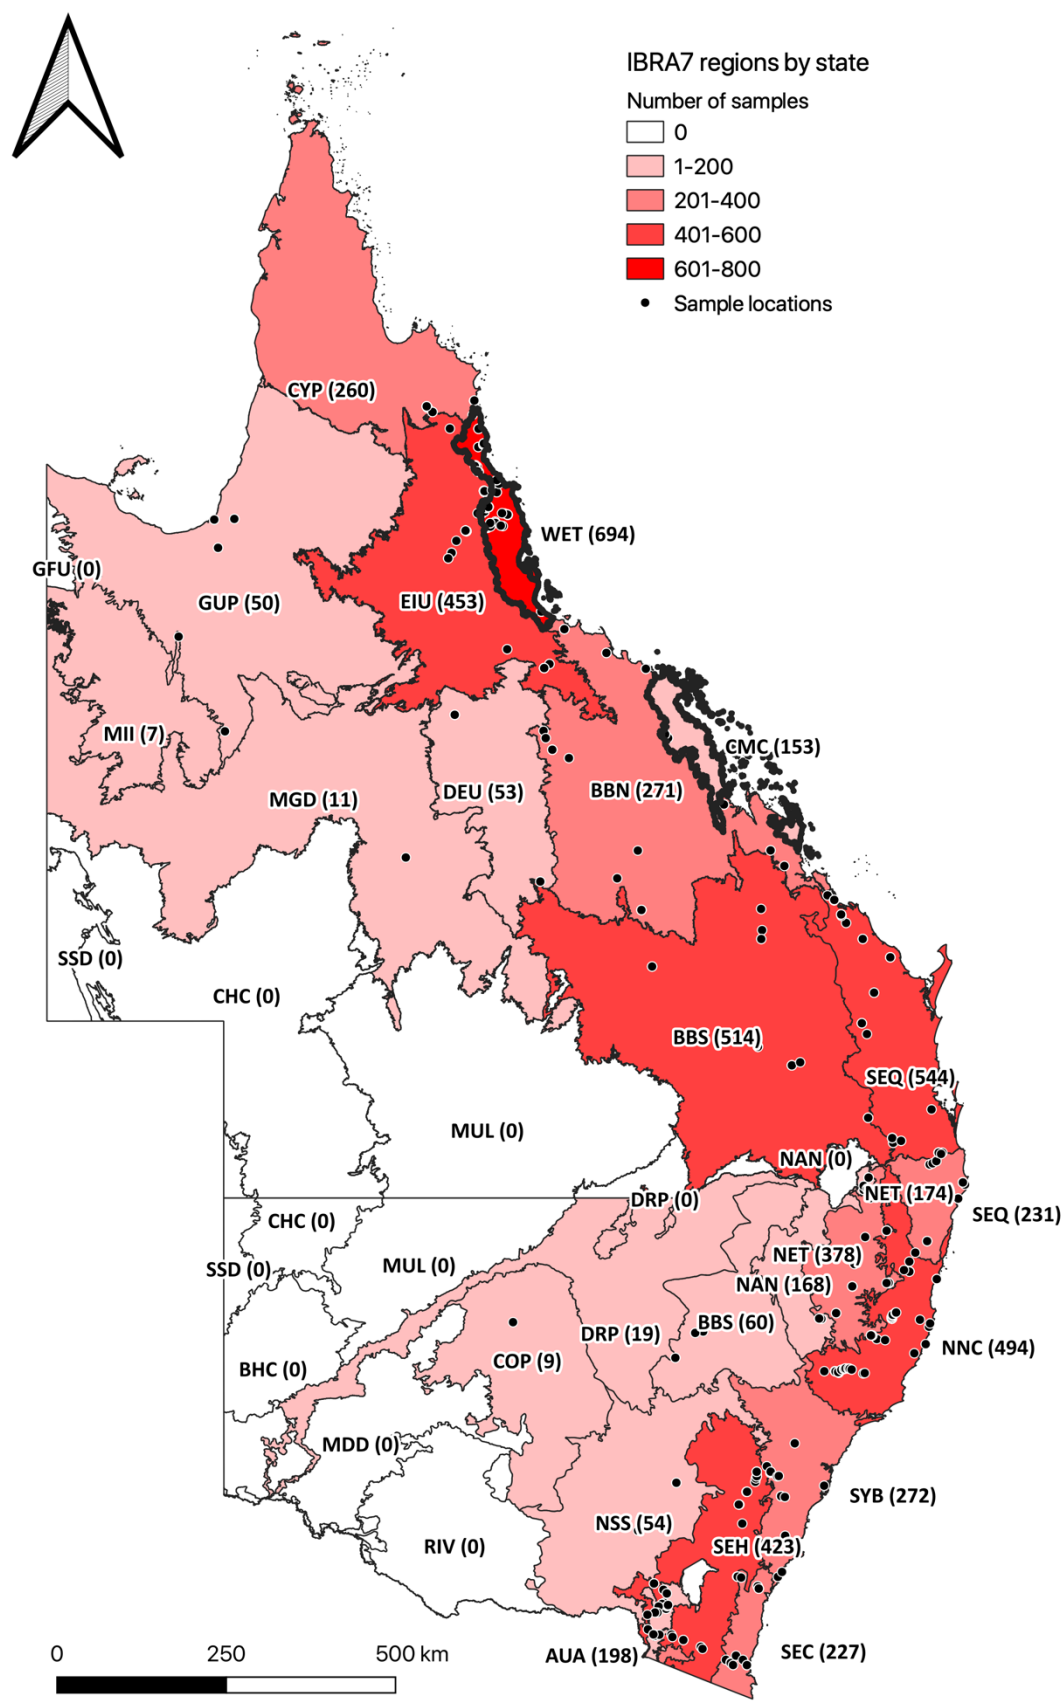

**Figure S3.** Heatmap of bee collections by Australian bioregion with the focus bioregions bolded. Points indicate the location of bee samples. Bioregion codes are: Australian Alps (AUA), Brigalow Belt South (BBS), Broken Hill Complex (BHC), Channel Country (CHC), Cobar Penepplain (COP), Darling Riverine Plains (DRP), Murray Darling Depression (MDD), Mulga Lands (MUL), Nandewar (NAN), New England Tablelands (NET), NSW North Coast (NNC), NSW South Western Slopes (NSS), Riverina (RIV), South East Corner (SEC), South Eastern Highlands (SEH), South Eastern Queensland (SEQ), Simpson Strzelecki Dunefields (SSD), Sydney Basin (SYB), Brigalow Belt North (BBN), Brigalow Belt South (BBS), Channel Country (CHC), **Central Mackay Coast (CMC)**, Cape York Peninsula (CYP), Desert Uplands (DEU), Darling Riverine Plains (DRP), Einasleigh Uplands (EIU), Gulf Fall and Uplands (GFU), Gulf Plains (GUP), Mitchell Grass Downs (MGD), Mount Isa Inlier (MII), Mulga Lands (MUL), Nandewar (NAN), New England Tablelands (NET), South Eastern Queensland (SEQ), and **Wet Tropics (WET)**.
